# Supplementary material for: LungDepo: modelling the regional particle deposition in the human lung via the Enalos Cloud platform
Source: Royal Society of Chemistry journal article supplement (doi:10.1039/d5en00299k), 2025-01-01
Supplement: d5en00299k1.pdf [file d5en00299k1.pdf]

**Supplementary Material for “*LungDepo: Modelling the regional particle deposition in the human lung via the Enalos Cloud Platform*”**

Dimitris G. Mintis,<sup>a, b</sup> Dimitra-Danai Varsou,<sup>b, c</sup> Panagiotis D. Kolokathis,<sup>b, c</sup> Andreas Tsoumanis,<sup>a, b</sup>  
Georgia Melagraki,<sup>d</sup> Johannes P. Seif,<sup>e</sup> Alejandro J. del Real,<sup>e, f</sup> Iseult Lynch,<sup>b, g</sup> Antreas Afantitis<sup>a, b, c \*</sup>

<sup>a</sup> NovaMechanics Ltd., Nicosia 1070, Cyprus

<sup>b</sup> Entelos Institute, Larnaca 6059, Cyprus

<sup>c</sup> NovaMechanics MIKE, Piraeus 18545, Greece

<sup>d</sup> Division of Physical Sciences and Applications, Hellenic Military Academy, Vari 16672, Greece

<sup>e</sup> IDENER, 41300 Sevilla, Spain

<sup>f</sup> Department of Systems and Automation, University of Seville, 41092 Seville, Spain

<sup>g</sup> School of Geography, Earth and Environmental Sciences, University of Birmingham, Birmingham B15 2TT, United Kingdom

## S1. REST APIs

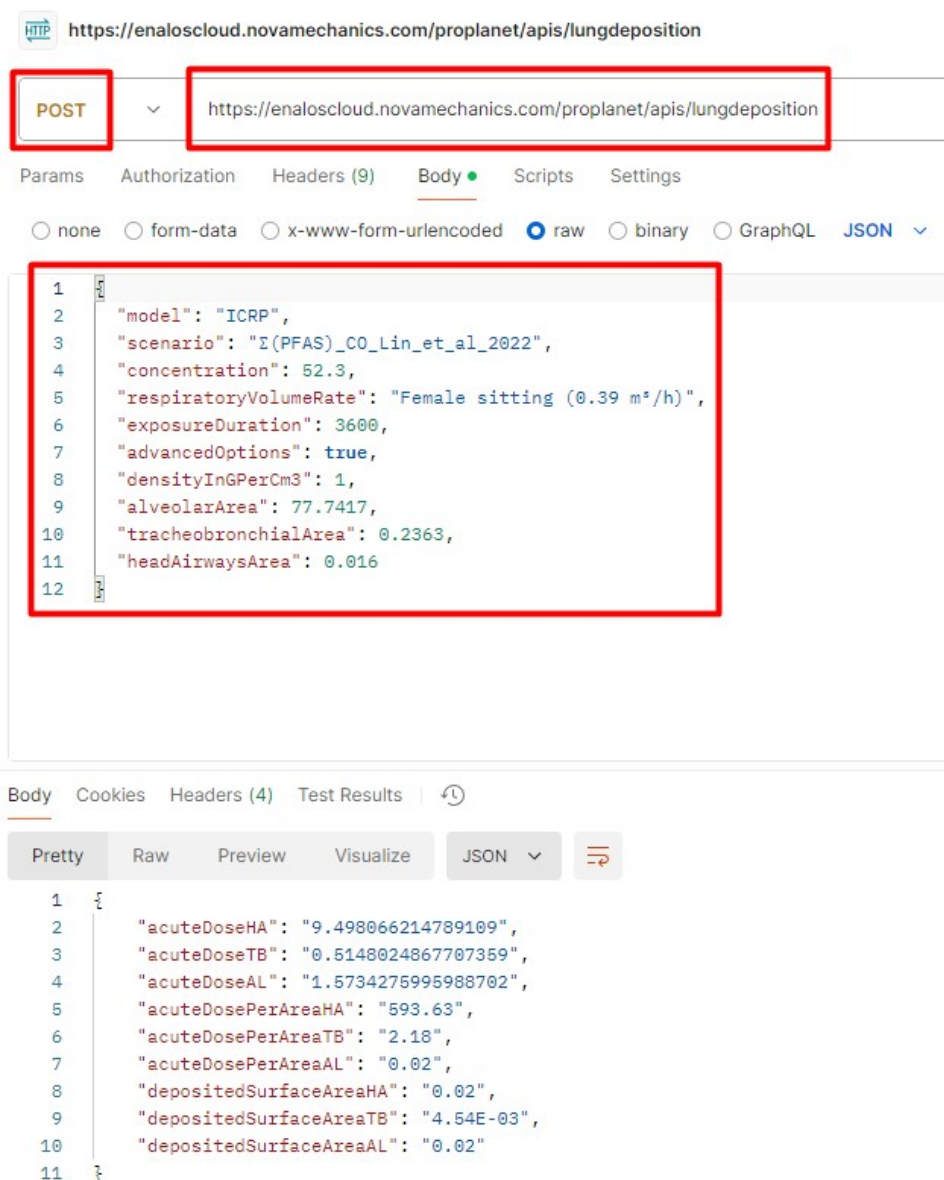

**Figure S1.** Using Postman to test the functionality of a 'POST' request for the endpoint <https://enaloscloud.novamechanics.com/proplanet/apis/lungdeposition>, including input data and response validation.

POST

/lungdeposition

Parameters

Cancel

| Name                                | Description                                                                                                                                                                                                                                                                                                                                                                                        |
|-------------------------------------|----------------------------------------------------------------------------------------------------------------------------------------------------------------------------------------------------------------------------------------------------------------------------------------------------------------------------------------------------------------------------------------------------|
| body                                |                                                                                                                                                                                                                                                                                                                                                                                                    |
| object                              | <div>Edit Value   Model</div> <div> <div>(body)</div> <pre>{   "model": "ICRP",   "scenario": "I(PFAS)_CO_Lin_et_al_2022",   "concentration": 52.3,   "respiratoryVolumeRate": "Female sitting (0.39 m³/h)",   "exposureDuration": 3600,   "advancedOptions": true,   "densityIngerCn3": 1,   "alveolarArea": 77.7417,   "tracheobronchialArea": 0.2363,   "headAirwaysArea": 0.016 }</pre> </div> |
|                                     | <div>Cancel</div> <div>Parameter content type</div> <div>application/json</div>                                                                                                                                                                                                                                                                                                                    |
| <div>Execute</div> <div>Clear</div> |                                                                                                                                                                                                                                                                                                                                                                                                    |

Responses

Response content type application/json

Curl

```
curl -X POST "https://enaloscloud.novamechanics.com/proplanet/apis/lungdeposition" -H "accept: application/json" -H "content-type: application/json" -d '{ "model": "ICRP", "scenario": "I(PFAS)_CO_Lin_et_al_2022", "concentration": 52.3, "respiratoryVolumeRate": "Female sitting (0.39 m³/h)", "exposureDuration": 3600, "advancedOptions": true, "densityIngerCn3": 1, "alveolarArea": 77.7417, "tracheobronchialArea": 0.2363, "headAirwaysArea": 0.016 }'
```

Request URL

https://enaloscloud.novamechanics.com/proplanet/apis/lungdeposition

Server response

Code

Details

200

Response body

```
{
  "acuteDoseIA": "9.498066214789109",
  "acuteDoseIB": "0.5148024867787359",
  "acuteDoseAL": "1.5734275995988702",
  "acuteDosePerAreaIA": "593.63",
  "acuteDosePerAreaIB": "2.18",
  "acuteDosePerAreaAL": "0.02",
  "depositedSurFaceAreaIA": "0.02",
  "depositedSurFaceAreaIB": "4.54E-03",
  "depositedSurFaceAreaAL": "0.02"
}
```

Download

Response headers

```
content-length: 291
content-type: application/json
date: Thu, 26 Jun 2025 11:43:15 GMT
```

Responses

Code

Description

**Figure S2.** Using Swagger to perform a /lungdeposition POST request, including input data and response validation.

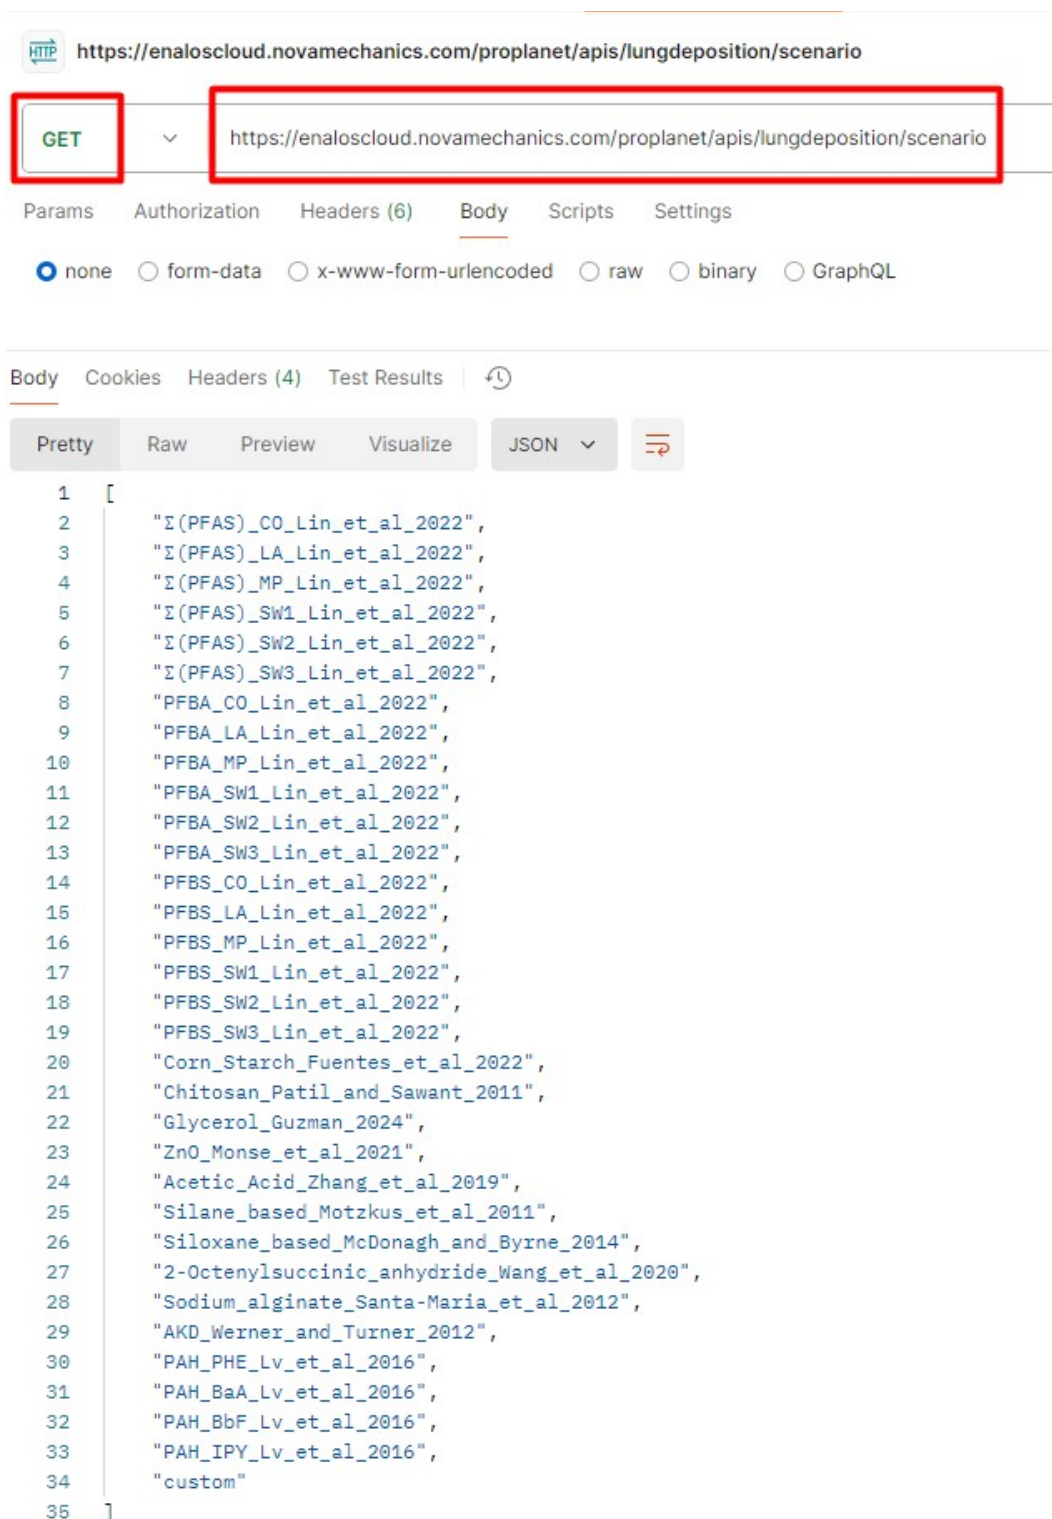

**Figure S3.** Using Postman to test the functionality of a ‘GET’ request for the endpoint <https://enaloscloud.novamechanics.com/proplanet/apis/lungdeposition/scenario>, verifying the request parameters and the expected response.

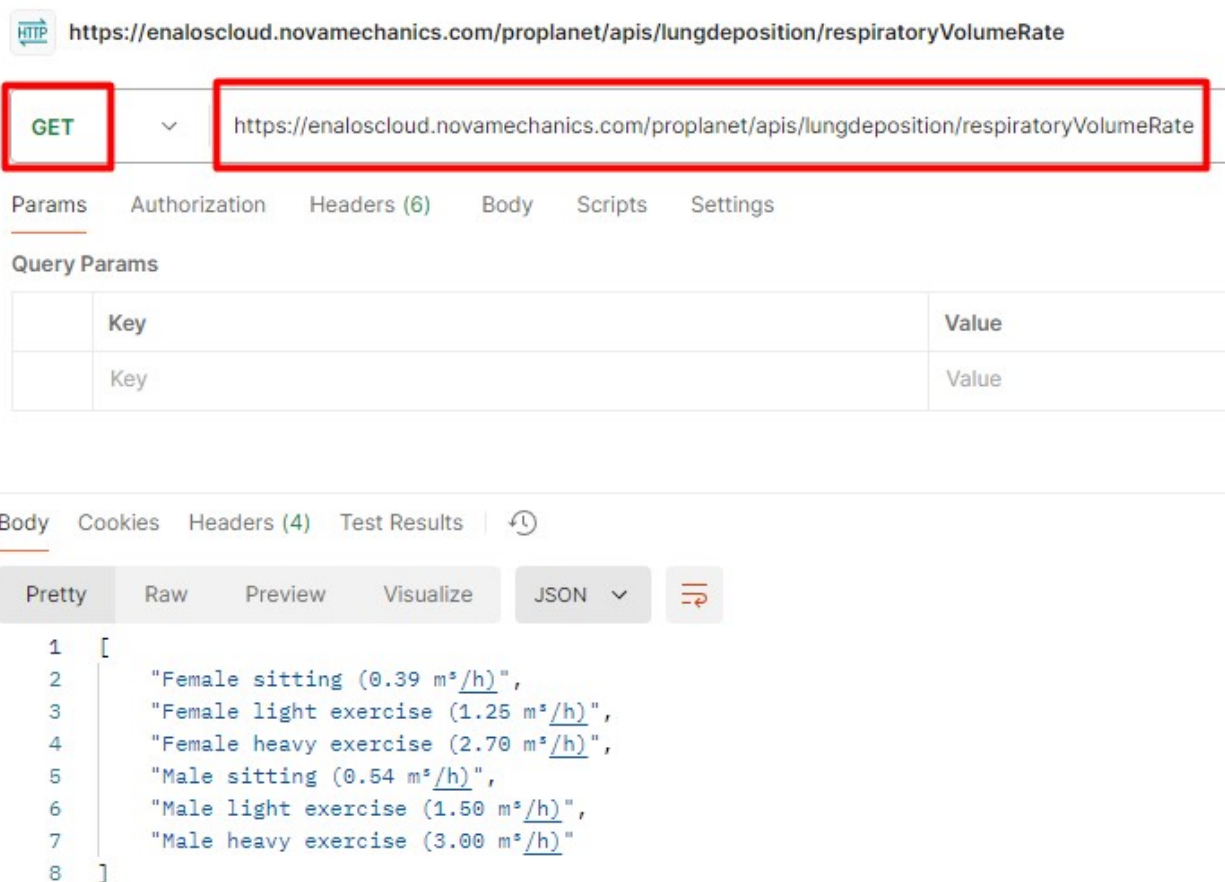

**Figure S4.** Using Postman to test the functionality of a 'GET' request for the endpoint <https://enaloscloud.novamechanics.com/proplanet/apis/lungdeposition/respiratoryVolumeRate>, verifying the request parameters and the expected response.

## S2. API robustness tests

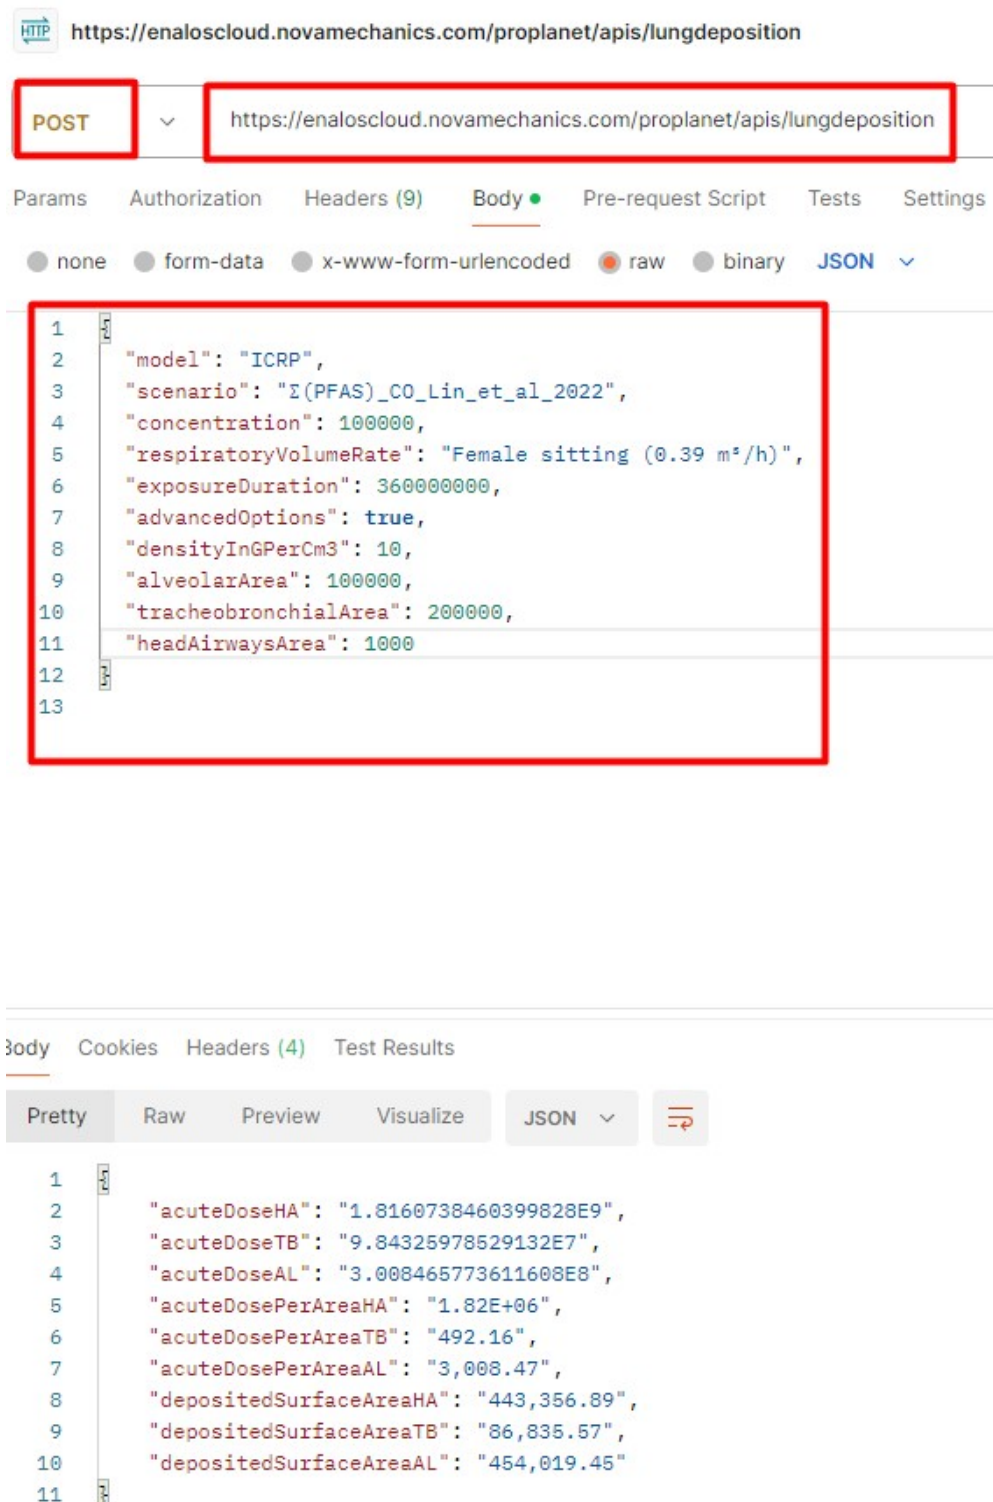

**Figure S5.** Using Postman to test the functionality of a 'POST' request for the endpoint <https://enaloscloud.novamechanics.com/proplanet/apis/lungdeposition>, including extremely high input data using the International Commission on Radiological Protection (ICRP) model and the response validation.

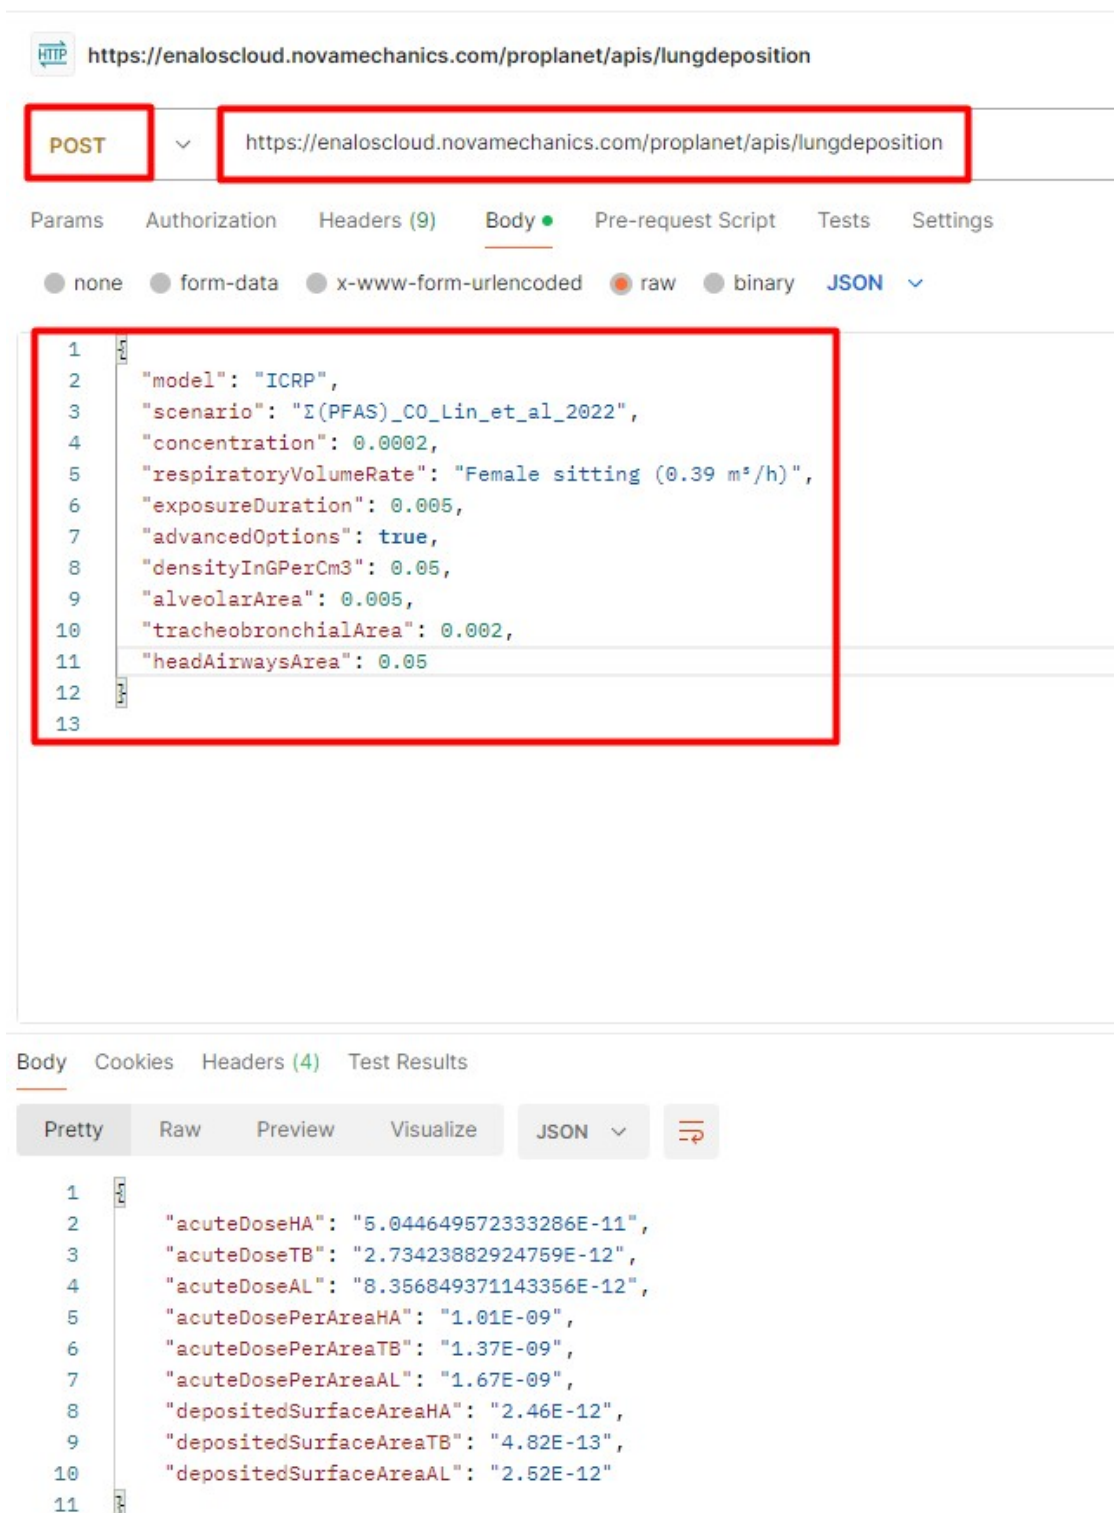

**Figure S6.** Using Postman to test the functionality of a 'POST' request for the endpoint <https://enaloscloud.novamechanics.com/proplanet/apis/lungdeposition>, including extremely low input data using the ICRP model and the response validation.



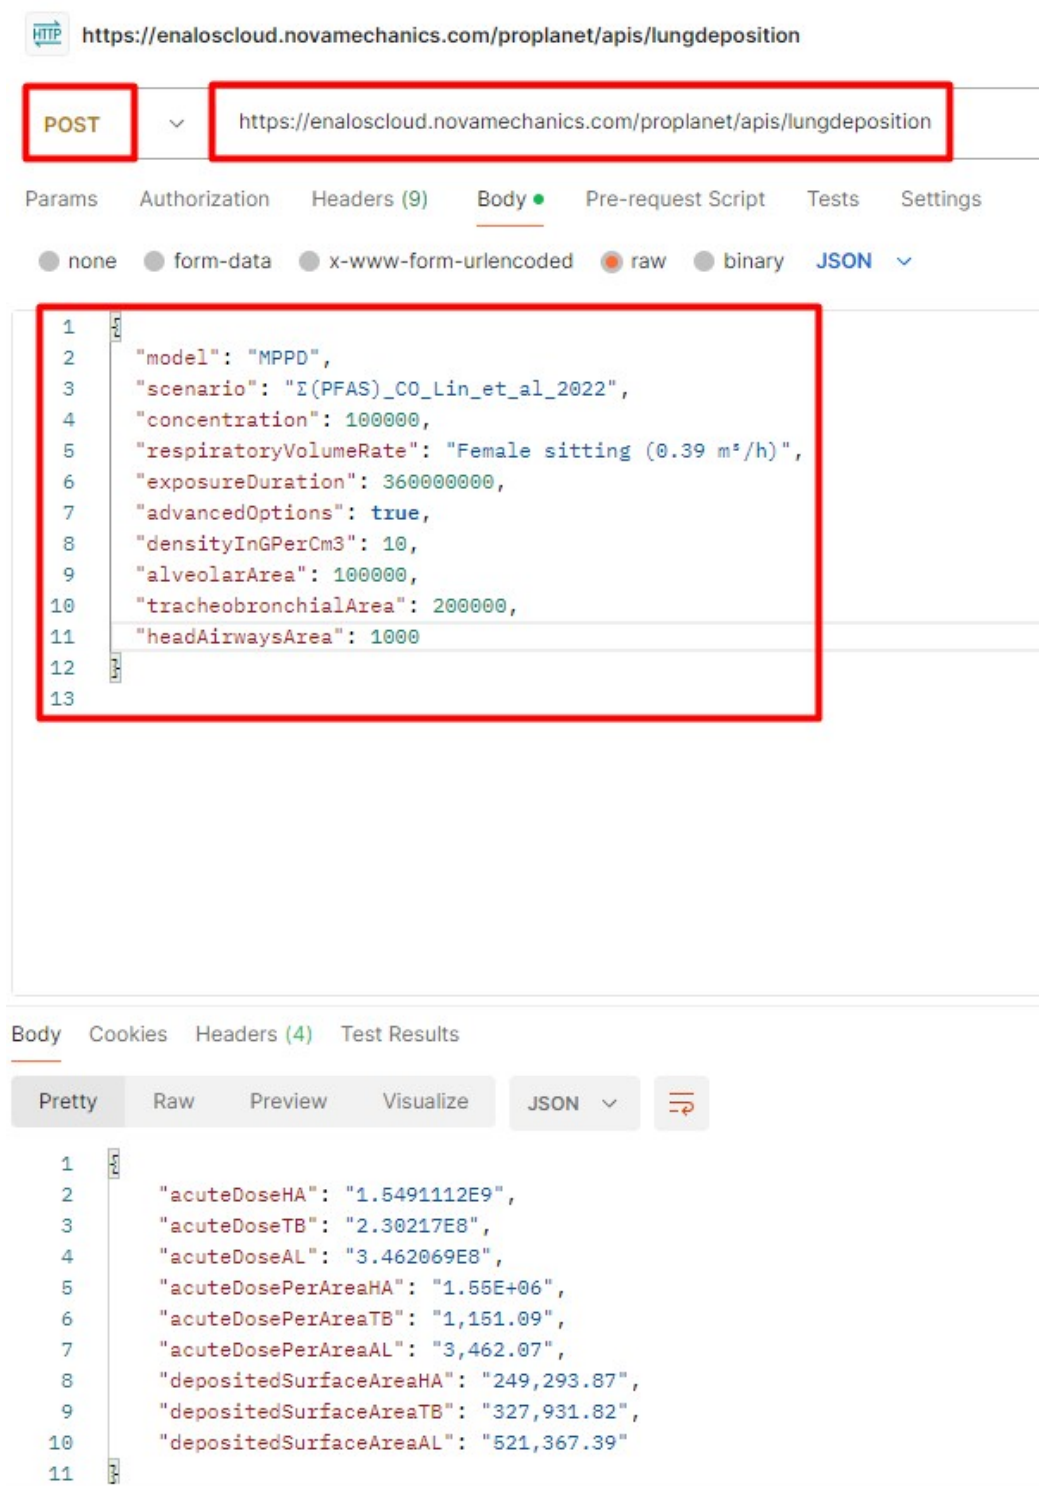

**Figure S7.** Using Postman to test the functionality of a ‘POST’ request for the endpoint <https://enaloscloud.novamechanics.com/proplanet/apis/lungdeposition>, including extremely high input data using the Multiple-Path Particle Dosimetry (MPPD) model and the response validation.



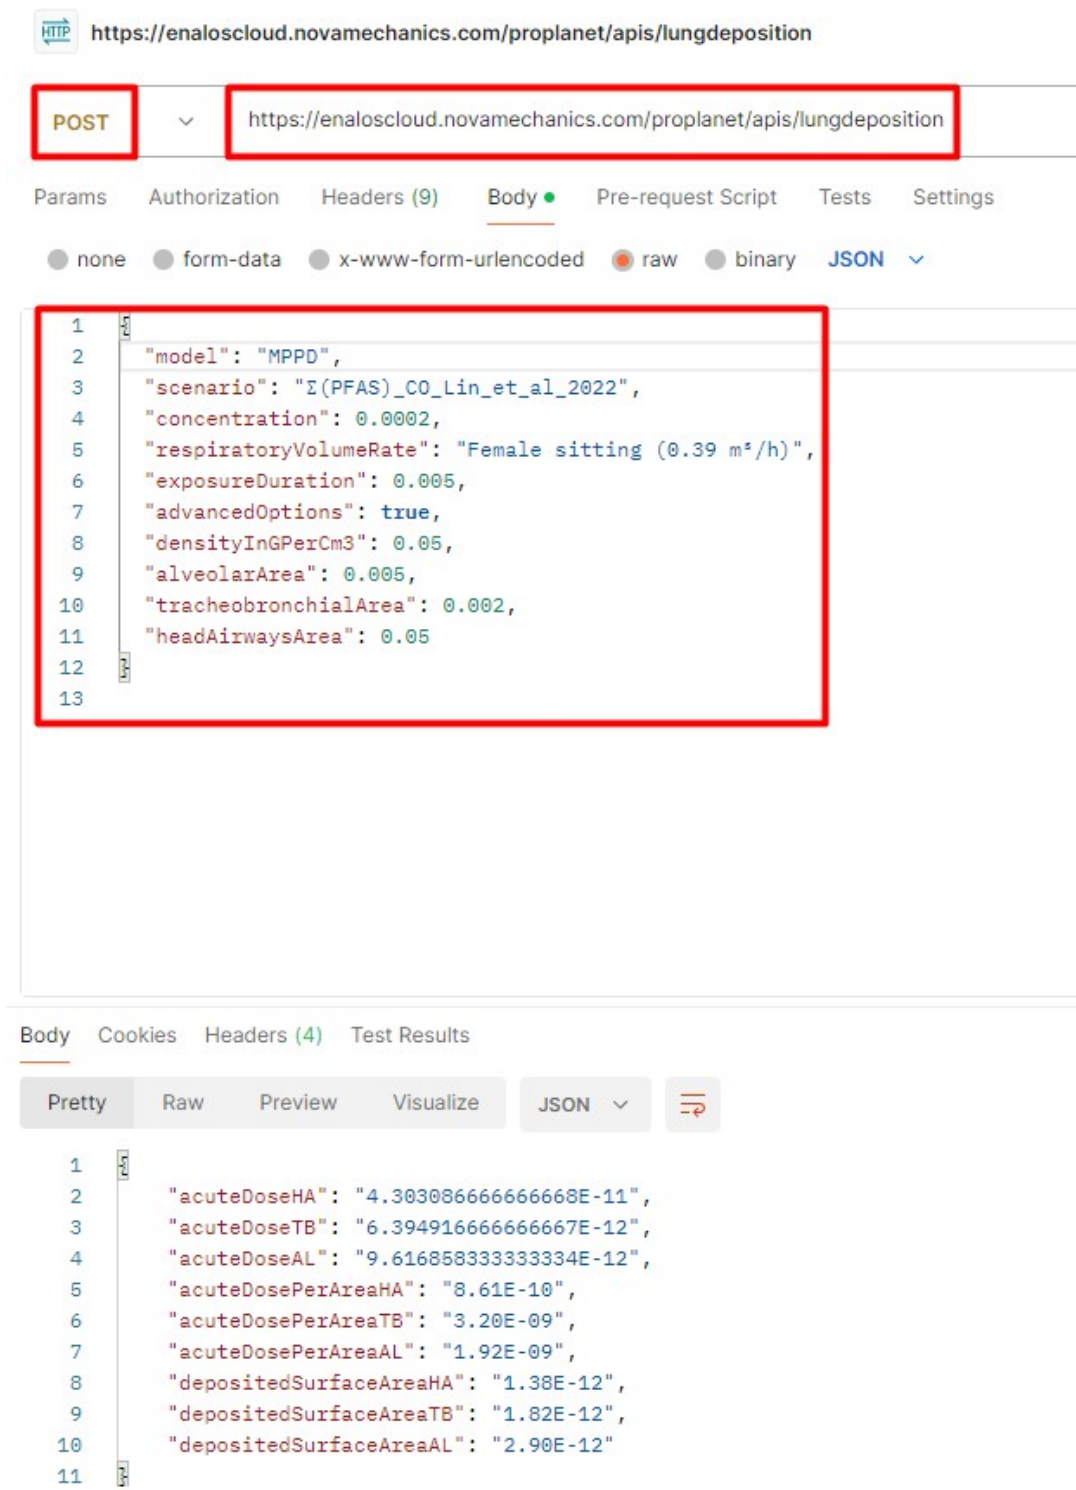

**Figure S8.** Using Postman to test the functionality of a ‘POST’ request for the endpoint <https://enaloscloud.novamechanics.com/proplanet/apis/lungdeposition>, including extremely low input data using the MPPD model and response validation.

S3. *LungDepo* results regarding mass deposited (%)

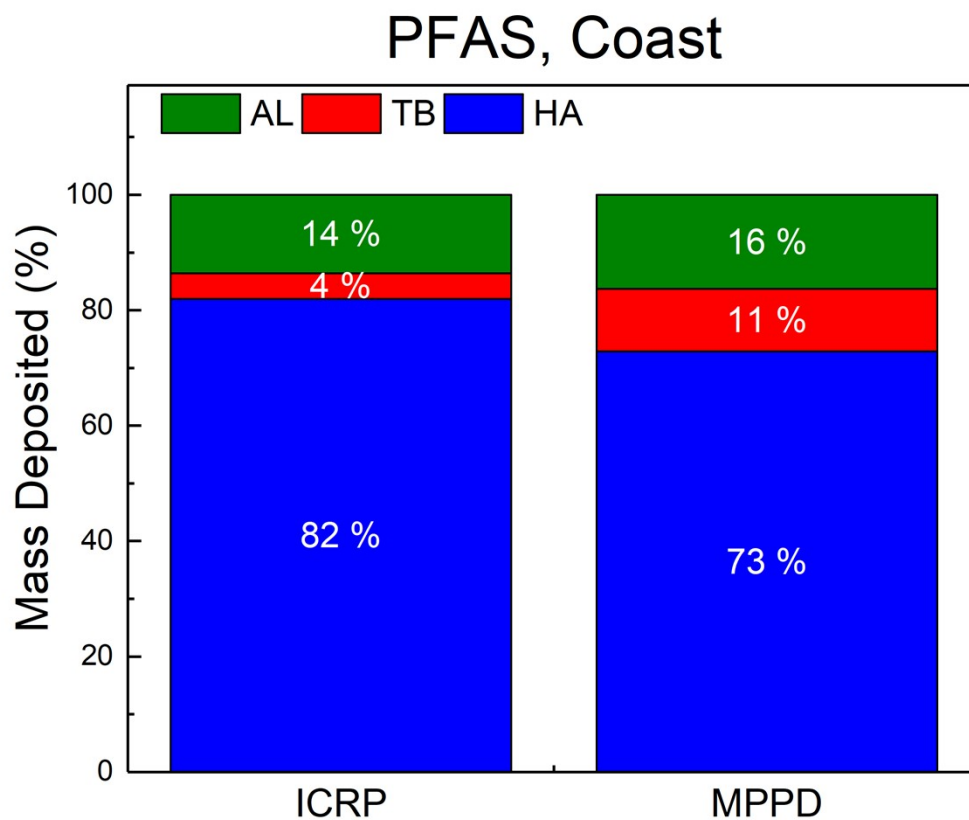

**Figure S9.** Prediction of the mass deposition measured in % of  $\sum^{PFAS}$  at coastal site as computed using the ICRP and MPPD models integrated within the *LungDepo* web application.

## PFAS, Natural Reserve

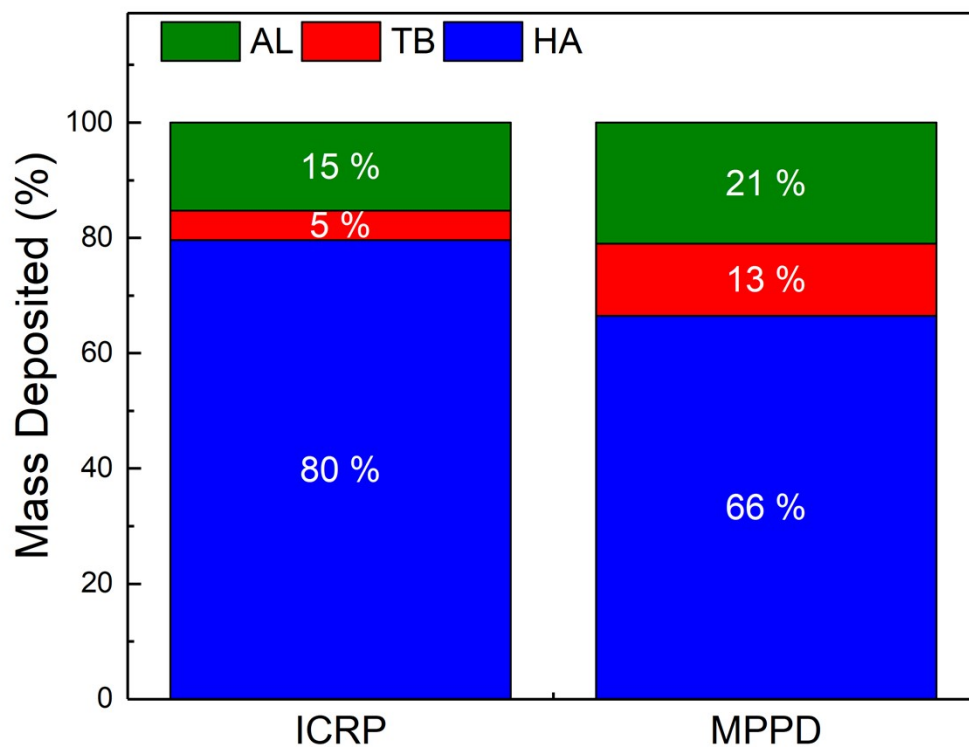

**Figure S10.** Prediction of the mass deposition measured in % of  $\sum^{PFAS}$  at natural reserve site as computed using the ICRP and MPPD models integrated within the *LungDepo* web application.

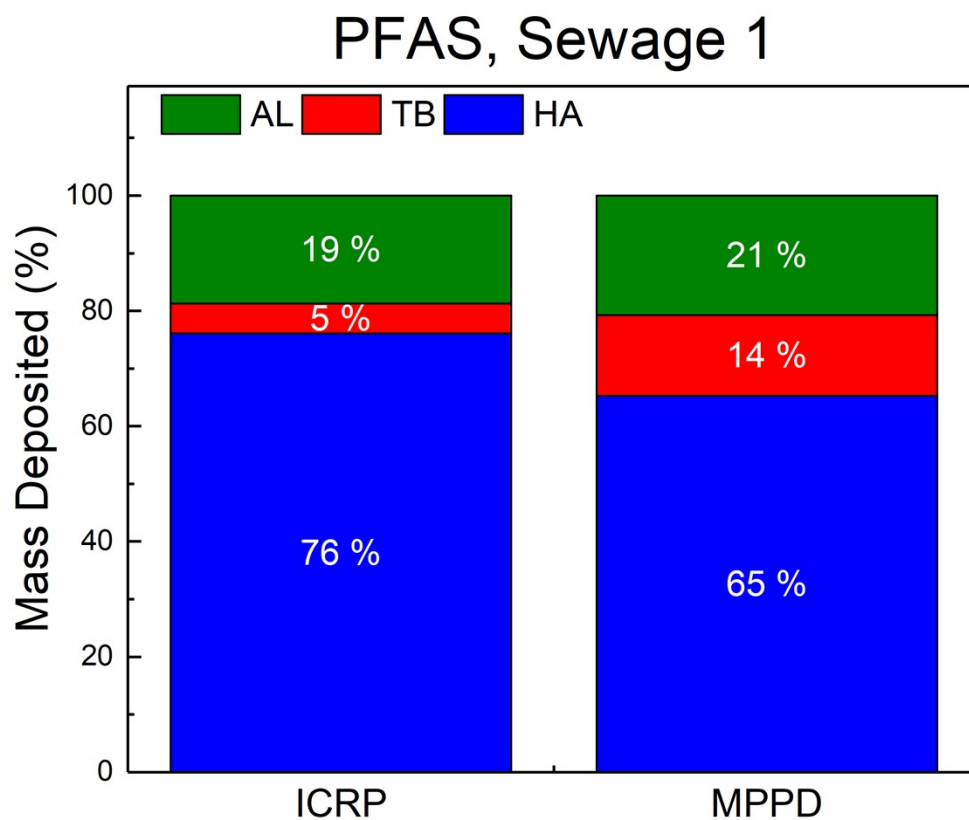

**Figure S11.** Prediction of the mass deposition measured in % of  $\sum PFAS$  at sewage 1 site as computed using the ICRP and MPPD models integrated within the *LungDepo* web application.

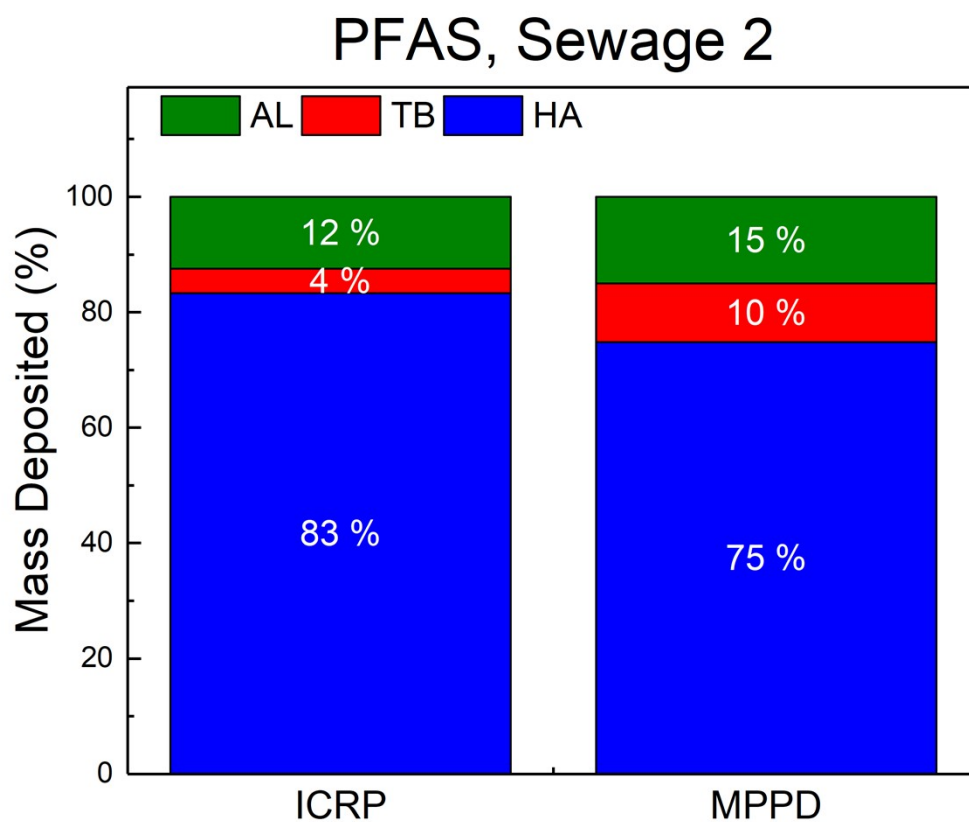

**Figure S12.** Prediction of the mass deposition measured in % of  $\sum PFAS$  at sewage 2 site as computed using the ICRP and MPPD models integrated within the *LungDepo* web application.

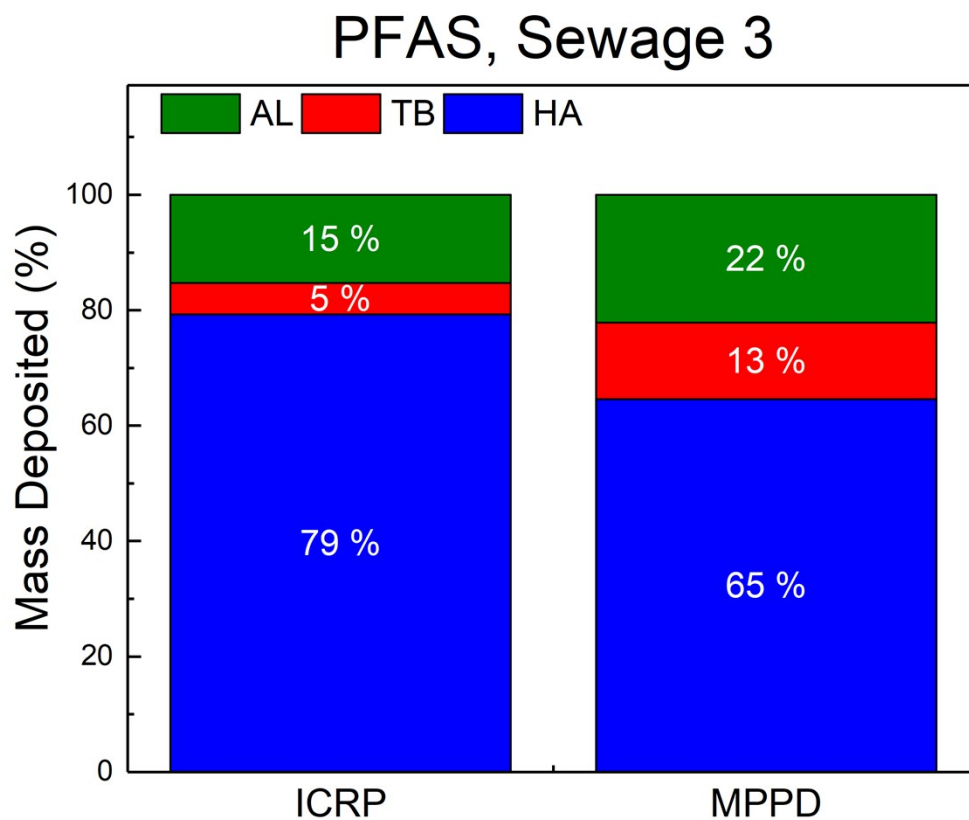

**Figure S13.** Prediction of the mass deposition measured in % of  $\sum PFAS$  at sewage 3 site as computed using the ICRP and MPPD models integrated within the *LungDepo* web application.

S4. *LungDepo* results regarding particle size deposited (%)

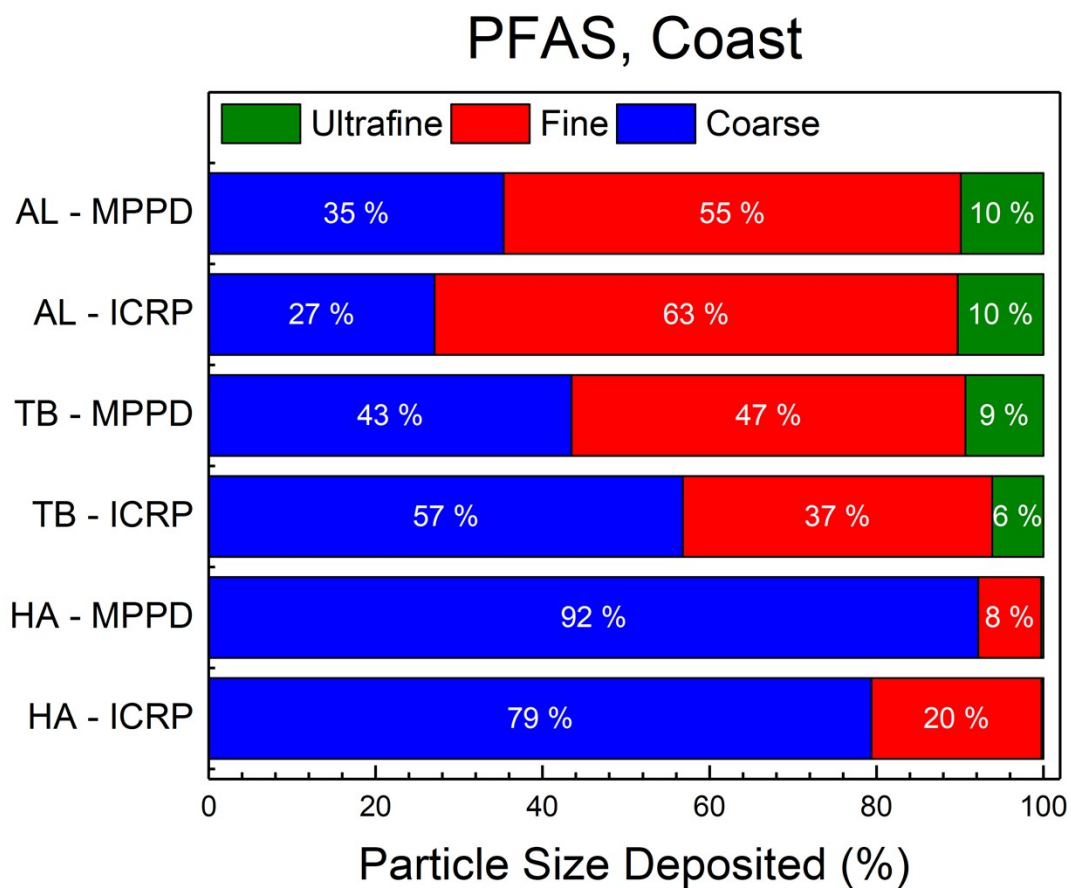

**Figure S14.** Contributions (expressed as percentages) of inhaled  $\sum^{PFAS}$  associated with particles of different sizes (at a coastal site) as calculated using the ICRP and MPPD models integrated within the *LungDepo* web application.



## PFAS, Natural Reserve

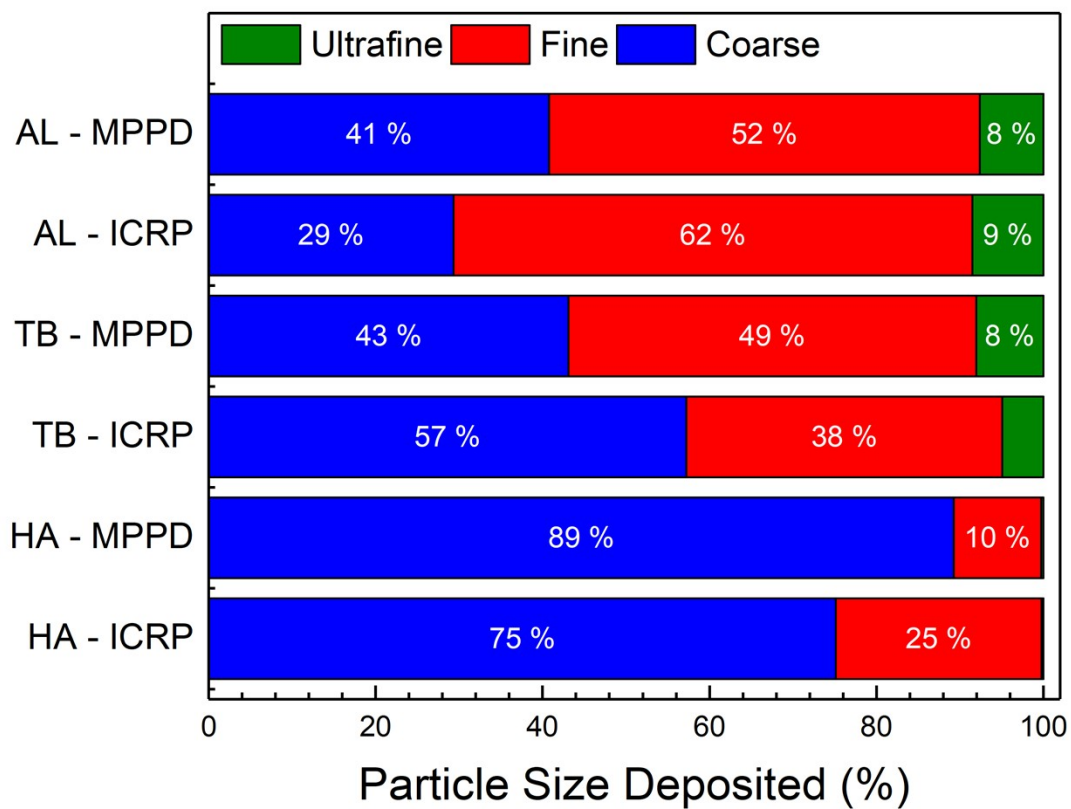

**Figure S15.** Contributions (expressed as percentages) of inhaled  $\sum PFAS$  associated with particles of different sizes (at natural reserve site) as calculated using the ICRP and MPPD models integrated within the *LungDepo* web application.

# PFAS, Sewage 1

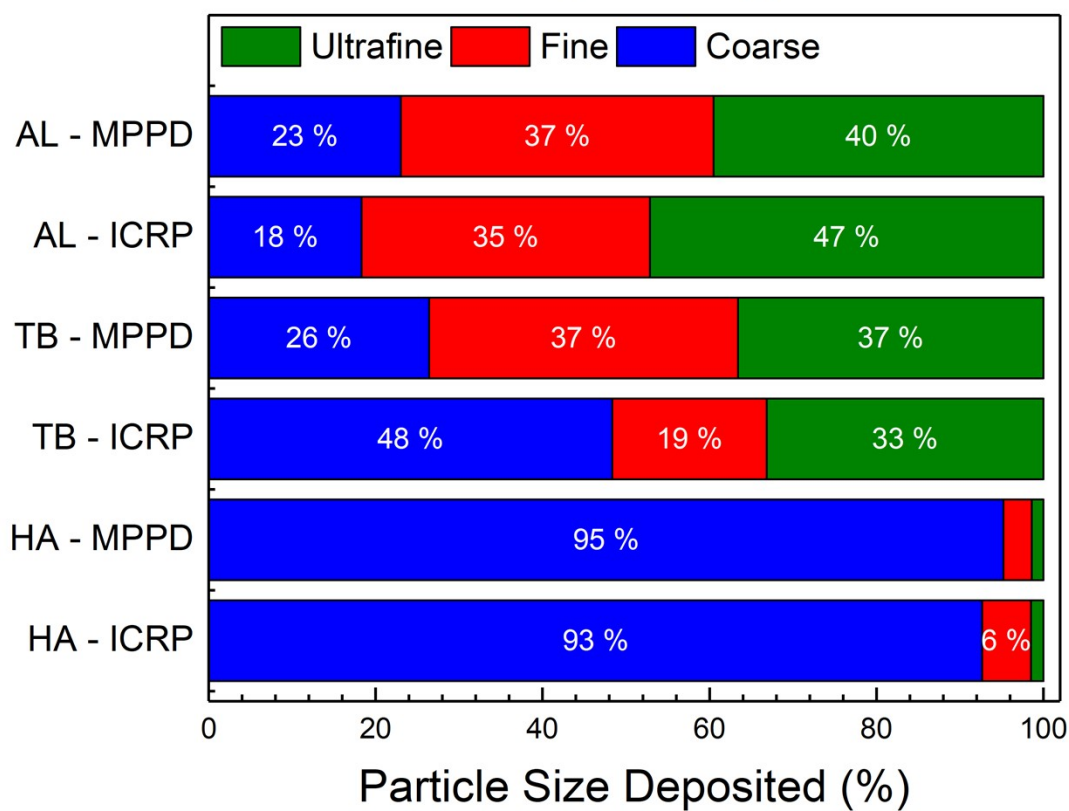

**Figure S16.** Contributions (expressed as percentages) of inhaled  $\sum PFAS$  associated with particles of different sizes (at sewage 1 site) as calculated using the ICRP and MPPD models integrated within the *LungDepo* web application.

## PFAS, Sewage 2

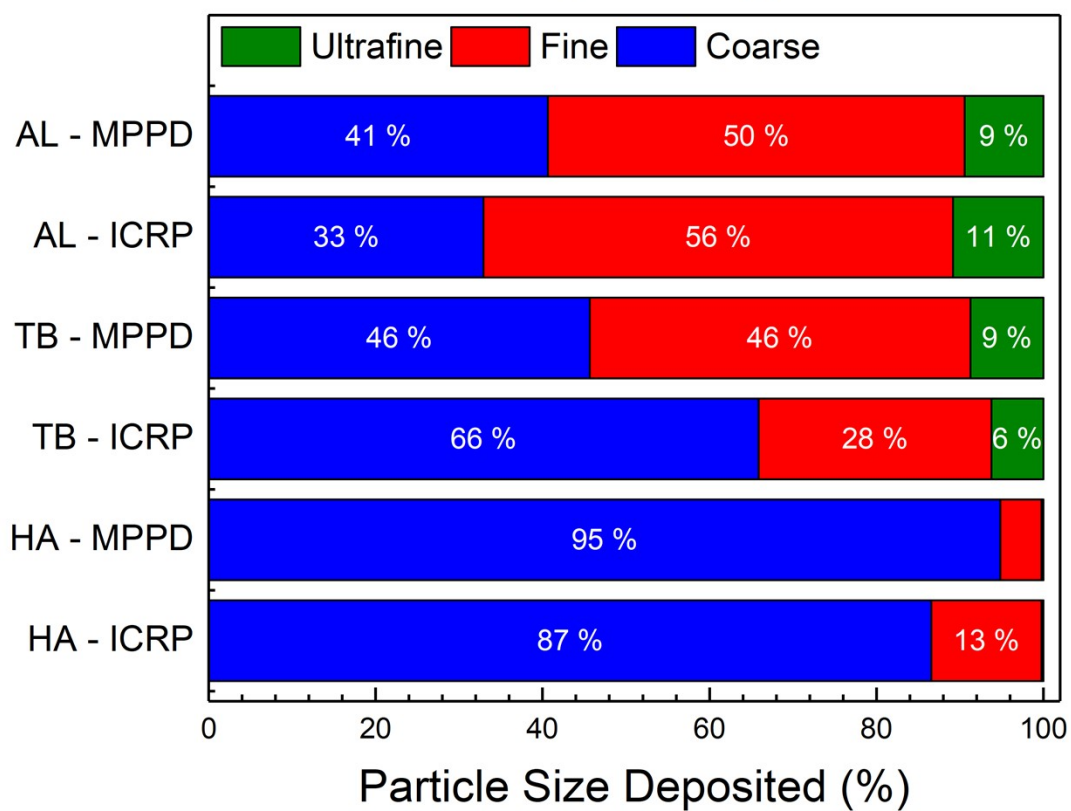

**Figure S17.** Contributions (expressed as percentages) of inhaled  $\sum PFAS$  associated with particles of different sizes (at sewage 2 site) as calculated using the ICRP and MPPD models integrated within the *LungDepo* web application.

## PFAS, Sewage 3

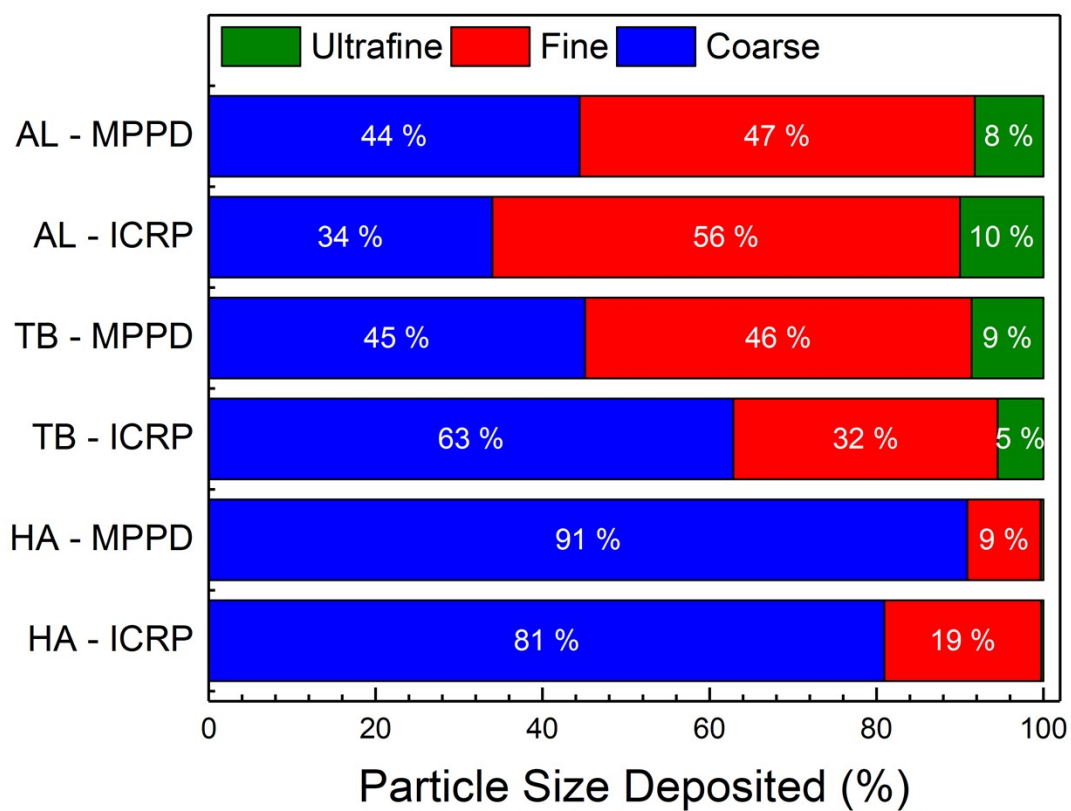

**Figure S18.** Contributions (expressed as percentages) of inhaled  $\sum PFAS$  associated with particles of different sizes (at sewage 3 site) as calculated using the ICRP and MPPD models integrated within the *LungDepo* web application.
